# Supplementary material for: Synthesis, Characterization, and Catalytic Exploration of Mononuclear Mo(VI) Dioxido Complexes of (Z)-1-R-2-(4′,4′-Dimethyl-2′-oxazolin-2′-yl)-eth-1-en-1-ates
Source: MDPI journal article supplement (doi:10.3390/molecules27041309), 2022-02-15
Supplement: s1 [file s1]

Supplementary Information for:

*Synthesis, Characterisation and Catalytic Exploration of Mononuclear Mo(VI) Dioxido Complexes of the (Z)-1-R-2-(4',4'-dimethyl-2'-oxazolin-2'-yl)-eth-1-en-1-ates*

*Authors:* A. Petrov, J. A. Adjei, A. J. Lough, R. S. Wylie & R. A. Gossage

UV-Visible spectroscopy of Complexes **1-4** ..... S-2

Physical Appearances of Complexes **1-4** ..... S-7

IR spectra of **1-4** ..... S-8

### Mo(O)<sub>2</sub>(L<sup>n</sup>)<sub>2</sub> complexes – IR and UV-Vis.

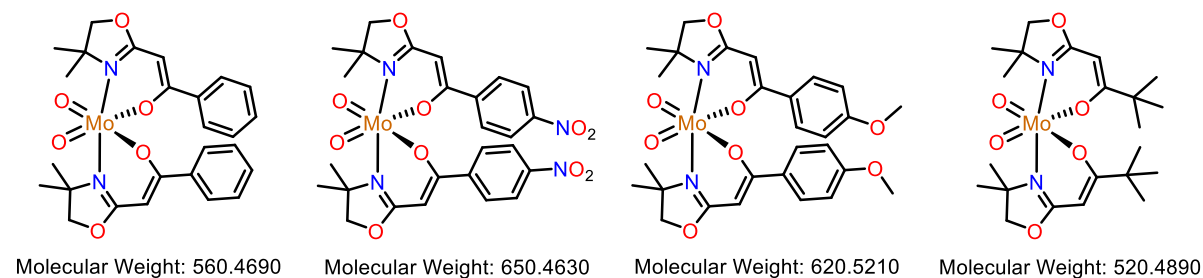

All together – normalized absorbance

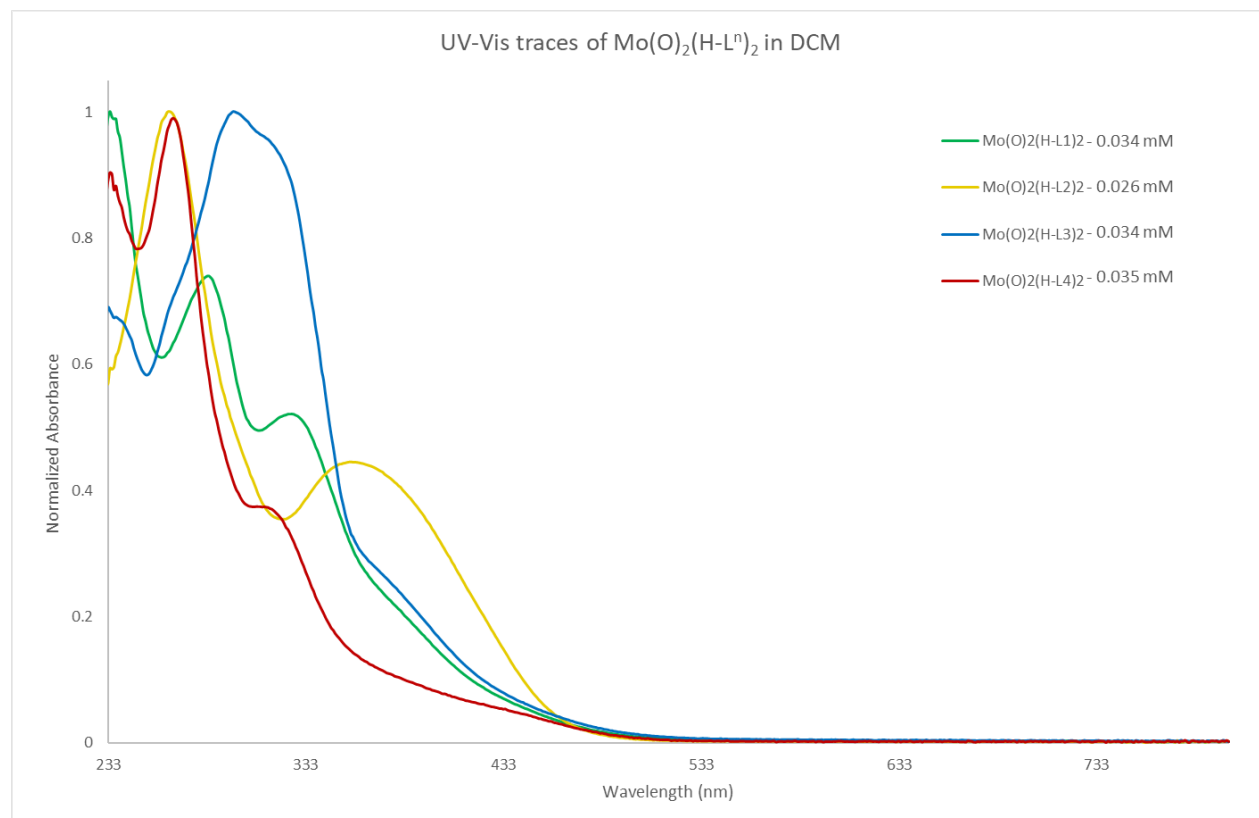

**Graph S1:** UV-Visible traces of all Mo complexes taken in DCM. Absorbance is normalized for clarity.

**Table S1:** Selected UV-Vis data for all four complexes analyzed. Each complex was dissolved in DCM and diluted to an approximate concentration of 0.03 mM. Absorbances shown in table are not normalized but instead is the raw unaltered data.

| Complex                                             | Conc. (mM) | $\lambda_{\text{max}}$ (nm) |                  |                  | Absorbance       |                  |                  | Molar Absorptivity (L/cm·mol) |              |              |
|-----------------------------------------------------|------------|-----------------------------|------------------|------------------|------------------|------------------|------------------|-------------------------------|--------------|--------------|
|                                                     |            | Max <sub>1</sub>            | Max <sub>2</sub> | Max <sub>3</sub> | Abs <sub>1</sub> | Abs <sub>2</sub> | Abs <sub>3</sub> | $\epsilon_1$                  | $\epsilon_2$ | $\epsilon_3$ |
| Mo(O) <sub>2</sub> (H-L <sup>1</sup> ) <sub>2</sub> | 0.0345     | 284                         | 326              | 393              | 0.903            | 0.636            | 0.207            | 26159                         | 18427        | 5998         |
| Mo(O) <sub>2</sub> (H-L <sup>2</sup> ) <sub>2</sub> | 0.0263     | 266                         | 258              | -                | 0.968            | 0.432            | -                | 36818                         | 16420        | -            |
| Mo(O) <sub>2</sub> (H-L <sup>3</sup> ) <sub>2</sub> | 0.0343     | 297                         | 313              | 378              | 1.129            | 1.081            | 0.280            | 32906                         | 91526        | 8150         |
| Mo(O) <sub>2</sub> (H-L <sup>4</sup> ) <sub>2</sub> | 0.0354     | 266                         | 308              | 434              | 0.674            | 0.254            | 0.035            | 19048                         | 7171         | 987          |

Complex 1:  $\text{Mo}(\text{O})_2(\text{L}^1)_2$

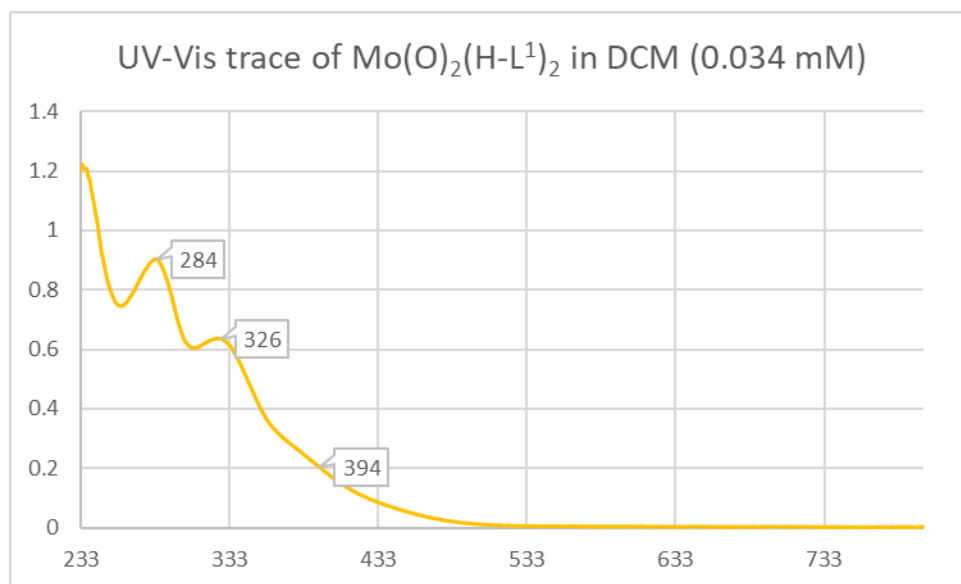

**Graph S2:** UV-Vis trace of  $\text{Mo}(\text{O})_2(\text{L}^1)_2$  in DCM (0.0345 mM). Absorbance is not normalized to 1.

Complex **2**:  $\text{Mo(O)}_2(\text{L}^2)_2$

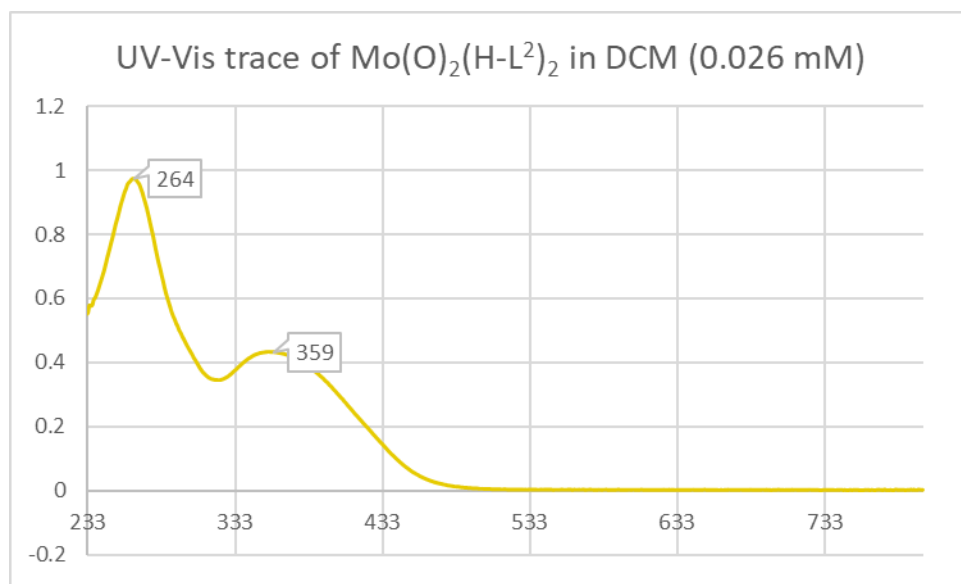

**Graph S3:** UV-Vis trace of  $\text{Mo(O)}_2(\text{L}^2)_2$  in DCM (0.0263 mM). Absorbance is not normalized to 1.

Complex **3**:  $\text{Mo(O)}_2(\text{L}^3)_2$

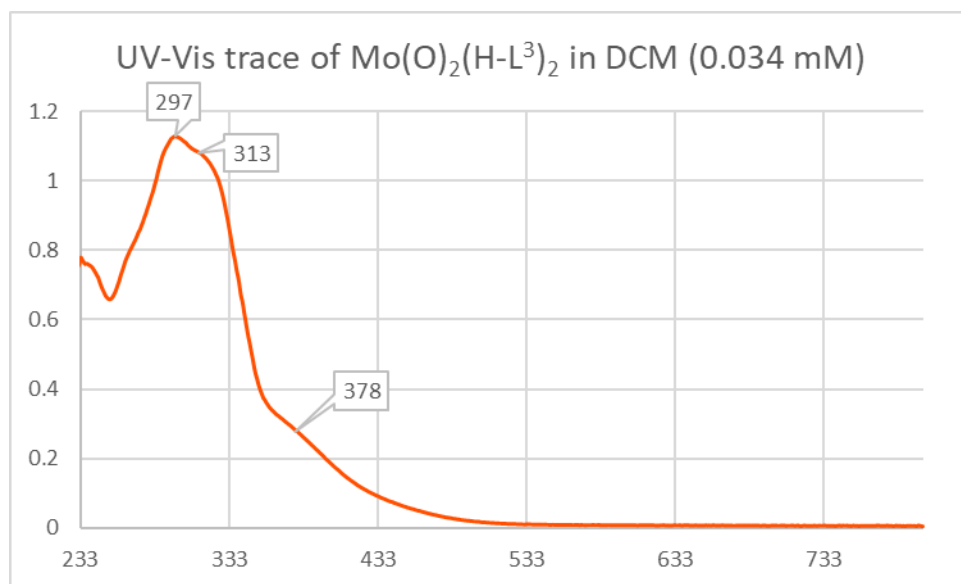

**Graph S4:** UV-Vis trace of  $\text{Mo(O)}_2(\text{L}^3)_2$  in DCM (0.0343 mM). Absorbance is not normalized to 1.

Complex **4**:  $\text{Mo(O)}_2(\text{L}^4)_2$

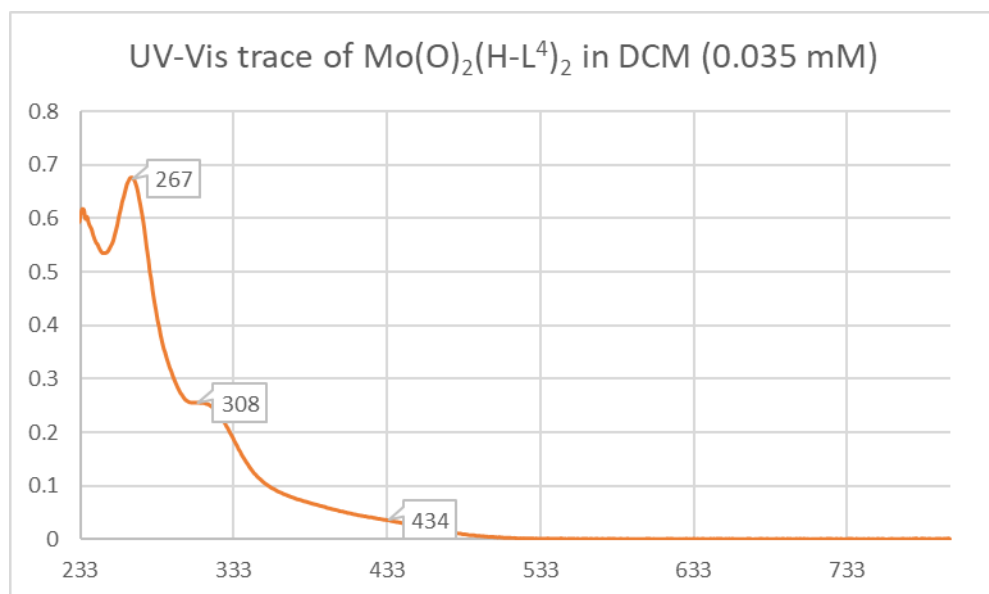

**Graph S5:** UV-Vis trace of  $\text{Mo(O)}_2(\text{L}^4)_2$  in DCM (0.0354 mM). Absorbance is not normalized to 1.

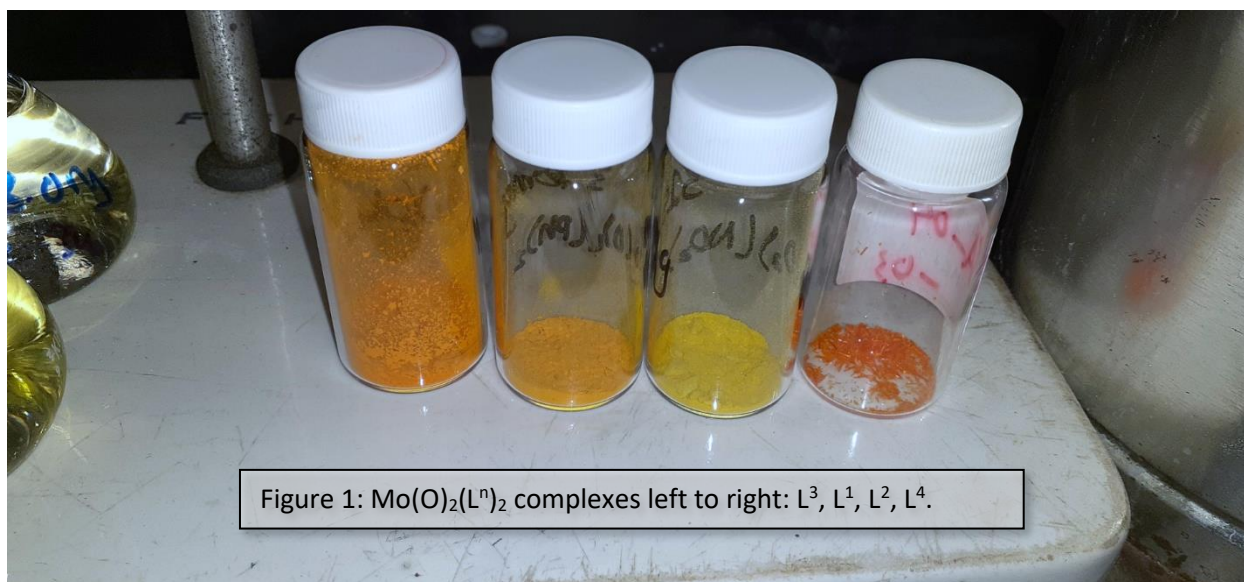

Physical appearances of complexes **1-4**.

## Complex 1

**Mo(O)<sub>2</sub>(L<sup>1</sup>)<sub>2</sub>***Agilent Resolutions Pro*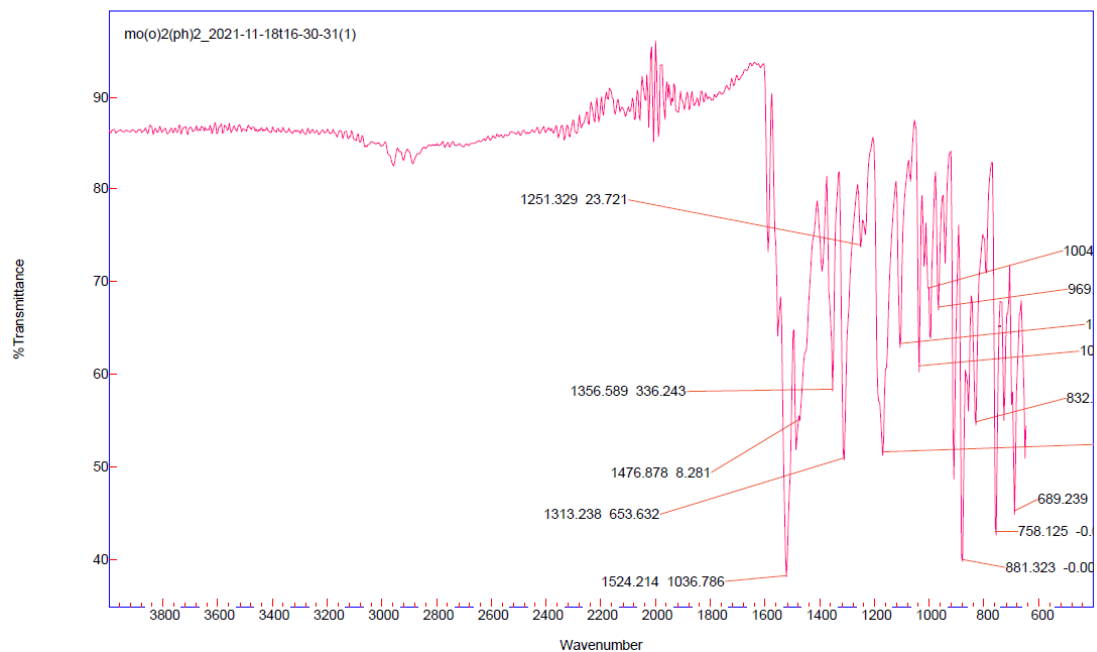

**Graph S6:** IR spectrum of Mo(O)<sub>2</sub>(L<sup>1</sup>)<sub>2</sub>. ν C=N: 1524, Mo=O: 881, Mo=O: 961, Mo-O: 758.



Complex 2:

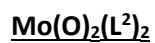

*Agilent Resolutions Pro*

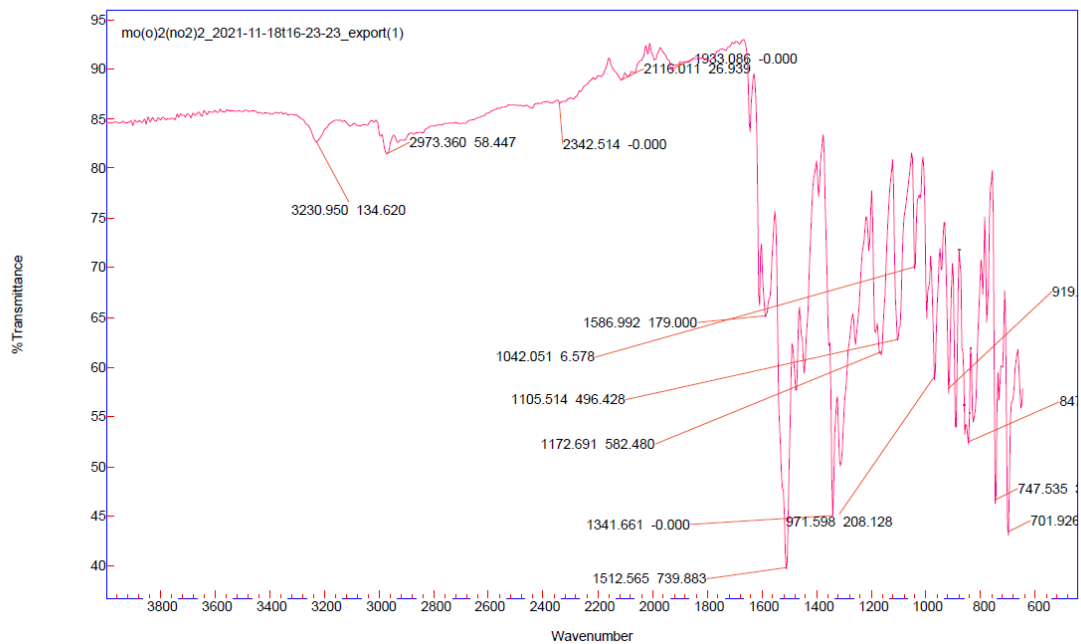

**Graph S7:** IR spectrum of Mo(O)<sub>2</sub>(L<sup>2</sup>)<sub>2</sub>. ν C=N: 1512, Mo=O: 971, Mo-O: 747.

Complex **3**:

**$\text{Mo(O)}_2(\text{L}^3)_2$**

*Agilent Resolutions Pro*

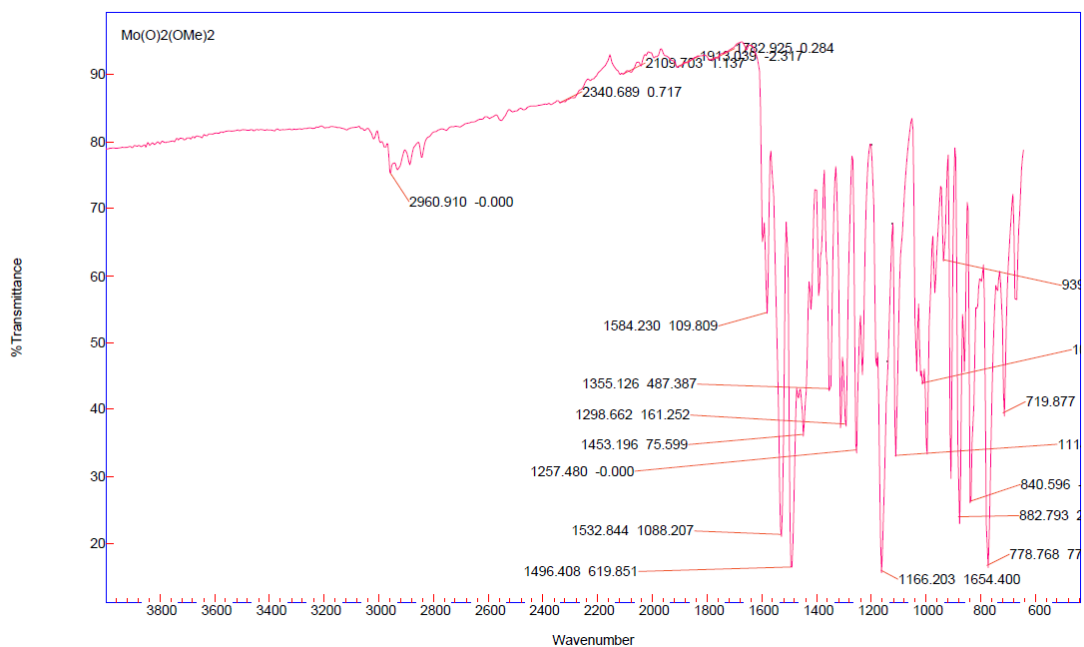

**Graph S8:** IR spectrum of  $\text{Mo(O)}_2(\text{H-L}^3)_2$ .  $\nu$  C=N: 1532, Mo=O: 882, Mo-O: 778.

Complex 4:

**Mo(O)<sub>2</sub>(L<sup>4</sup>)<sub>2</sub>**

*Agilent Resolutions Pro*

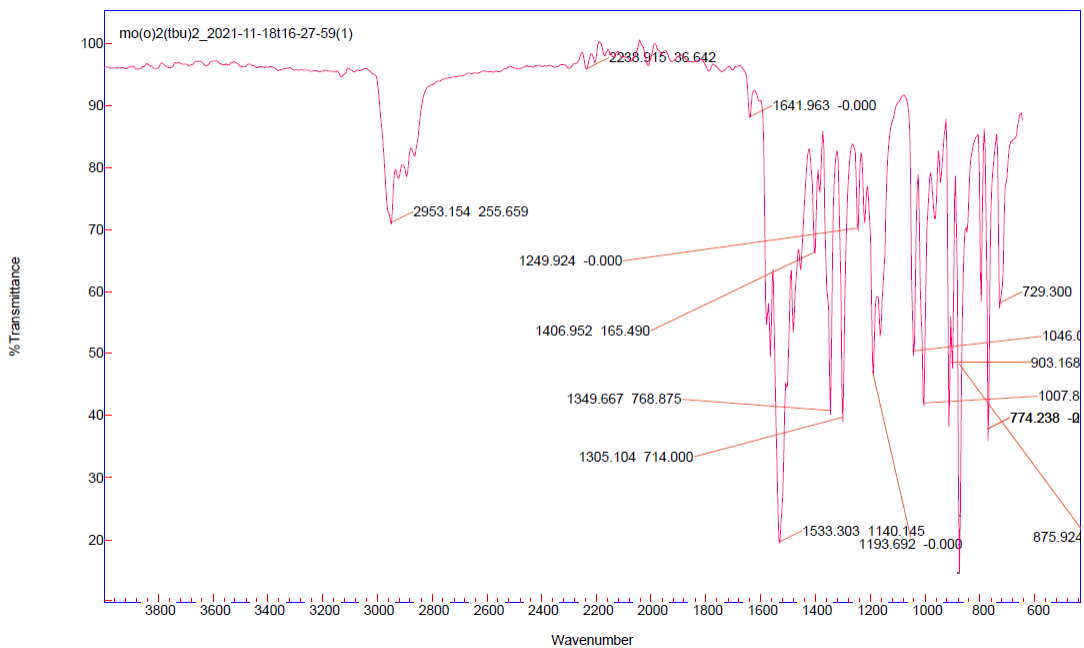

**Graph S9:** IR spectrum of Mo(O)<sub>2</sub>(L<sup>4</sup>)<sub>2</sub>. ν C=N: 1533, Mo=O: 850. Mo-O: 774.
